# Supplementary material
Source: PubMed Central journal article supplement (PMC9383441)
Supplement: deac020_supplementary_table_s4.pdf [file deac020_supplementary_table_s4.pdf]

**Supplementary Table SIV Agreement of choice of best blastocyst by clinic for the time-lapse group in the full analysis set population.**

| Variable                                               | Clinic            | Time-lapse group<br>(n = 369)   |
|--------------------------------------------------------|-------------------|---------------------------------|
| Choice of best blastocyst changed with use of KIDscore | All clinics       | 154/369 (42.0%)<br>(36.9–47.2%) |
|                                                        | Livio Göteborg    | 50/115 (44.2%)<br>(34.9–53.9%)  |
|                                                        | Livio Malmö       | 3/7 (42.9%)<br>(9.9–81.6%)      |
|                                                        | Livio Falun       | 6/8 (75.0%)<br>(34.9–96.8%)     |
|                                                        | Livio Umeå        | 15/47 (31.9%)<br>(19.1–47.1%)   |
|                                                        | Livio Island      | 25/50 (50.0%)<br>(35.5–64.5%)   |
|                                                        | Livio Oslo        | 8/16 (50.0%)<br>(24.7–75.4%)    |
|                                                        | Livio Gärdet      | 7/16 (43.8%)<br>(19.8–70.1%)    |
|                                                        | Livio Kungsholmen | 10/20 (50.0%)<br>(27.2–72.8%)   |
|                                                        | Sahlgrenska       | 22/62 (35.5%)<br>(23.7–48.7%)   |
|                                                        | Karolinska        | 8/28 (28.6%)<br>(13.2–48.7%)    |

For categorical variables, n (%) and exact 95% CI is presented.
