# Supplementary material
Source: PubMed Central journal article supplement (PMC9383441)
Supplement: deac020_supplementary_table_s5.pdf [file deac020_supplementary_table_s5.pdf]

**Supplementary Table SV Agreement of choice of best blastocyst and ongoing pregnancy subgrouped by version of KIDScore Algorithm Model in the time-lapse group only.**

| Variable                       | KIDScore Algorithm Model used (time-lapse group only) | No, the choice of best blastocyst did not change with use of KIDScore (n = 213) | Yes, the choice of best blastocyst changed with use of KIDScore (n = 154) | P-value | Difference between groups Mean (95% CI) |
|--------------------------------|-------------------------------------------------------|---------------------------------------------------------------------------------|---------------------------------------------------------------------------|---------|-----------------------------------------|
| No. of ongoing pregnancies (%) | KIDScore D5 v1                                        | 2/3 (66.7%)<br>(9.4–99.2%)                                                      | 2/3 (66.7%)<br>(9.4–99.2%)                                                | 1.00    | 0 (–76.4, 76.4)                         |
|                                | KIDScore D5 v2                                        | 64/137 (46.7%)<br>(38.2–55.4%)                                                  | 52/112 (46.4%)<br>(37.0–56.1%)                                            | 1.00    | 0.3 (–13, 13.6)                         |
|                                | KIDScore D5 v3                                        | 37/73 (50.7%)<br>(38.7–62.6%)                                                   | 16/39 (41.0%)<br>(25.6–57.9%)                                             | 0.44    | 9.7 (–11.5, 30.9)                       |

For categorical variables, n (%) and exact 95% CI is presented. For comparison between groups, Fisher's exact test (lowest one-sided P-value multiplied by 2) was used for dichotomous variables. The CI for dichotomous variables is the unconditional exact confidence limits. If no exact limits can be computed the asymptotic Wald confidence limits with continuity correction are calculated instead.
